# Supplementary material for: Dysregulated cholesterol homeostasis results in resistance to ferroptosis increasing tumorigenicity and metastasis in cancer
Source: PubMed Central journal article supplement (PMC8385107; doi:10.1038/s41467-021-25354-4), 2021-08-24
Supplement: 41467_2021_25354_MOESM3_ESM.pdf [file 41467_2021_25354_MOESM3_ESM.pdf]

## **Description of Additional Supplementary Files**

**Supplementary Data-1** qRT-PCR analysis of the mRNA expression levels of LXR, SREBP1c and SREBP2 target genes involved in lipid metabolism from 4T1, Met1, MDAMB436, HCC1954 and Py230 cells treated with 27HC (5  $\mu$ M) for 24 -72 hours. Numerical source data to support Figure 1e and Supplementary Figure 2a.

**Supplementary Data-2** qRT-PCR profiling of the expression of select genes involved in lipid metabolism in 27HCS- and 27HCR derivatives of 4T1, Py230, HCC1954, B16F10 and B6PD cells treated with 0.1% DMSO or 27HC (5  $\mu$ M) for 24-72hr. Numerical source data to support Figure 3a and Supplementary Figure 4a.

**Supplementary Data-3** The abundance of neutral lipids and phospholipid in 27HCS- and 27HCR-HCC1954 cells. Numerical source data to support Supplementary Figure 4c-j.

**Supplementary Data-4** qRT-PCR analysis of the mRNA expression levels of genes involved in lipid uptake and trafficking in 27HCS- and 27HCR derivatives of 4T1, Py230, HCC1954 and B16F10 cell lines. Numerical source data to support Figure 3e.

**Supplementary Data-5** qRT-PCR analysis of the expression of genes involved in ferroptosis pathway in 27HCS- and 27HCR derivatives of B16F10, Py230, HCC1954, MDAMB436 and 4T1 cells. Numerical source data to support Figure 4C and Supplementary Figure 6b.

**Supplementary Data-6** names and sequences of qRT-PCR primers.
